# Supplementary material for: Theoretical study on the influence of a secondary metal on the Cu(110) surface in the presence of H2O for methanol decomposition
Source: Royal Society of Chemistry journal article supplement (doi:10.1039/c5ra18226c), 2016-01-01
Supplement: c5ra18226c1.pdf [file c5ra18226c1.pdf]

Theoretical study on the influence of a secondary metal on the Cu(110) surface  
with the presence of H<sub>2</sub>O for methanol decomposition

Yong-Chao Zhang<sup>1</sup>, Rui-Peng Ren<sup>1</sup>, Shi-Zhong Liu<sup>2</sup>, Zhi-Jun Zuo<sup>1\*</sup> and Yong-Kang Lv<sup>1\*</sup>

<sup>1</sup>Key Laboratory of Coal Science and Technology of Ministry of Education and Shanxi Province, Taiyuan University of Technology, Taiyuan 030024, Shanxi China; <sup>2</sup> Department of Chemistry, Stony Brook University, Stony Brook, New York 11794, United States

\*Corresponding author. Fax: +86 351 6010386. E-mail address: lykang@tyut.edu.cn (Y.-K. Lv); zuozhijun@tyut.edu.cn (Z.-J. Zuo).

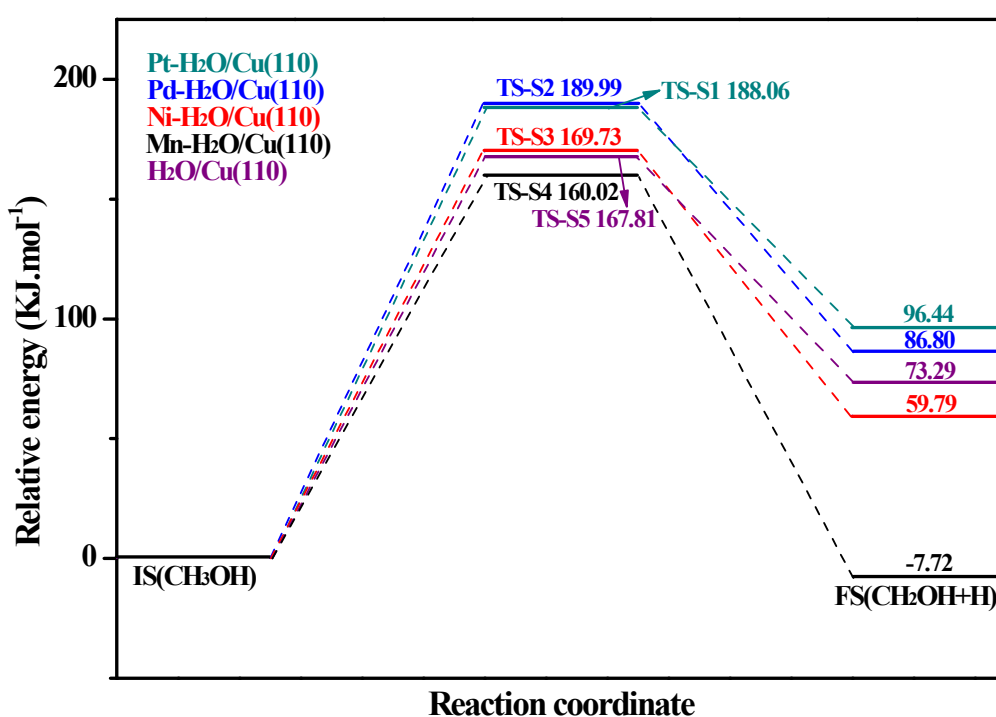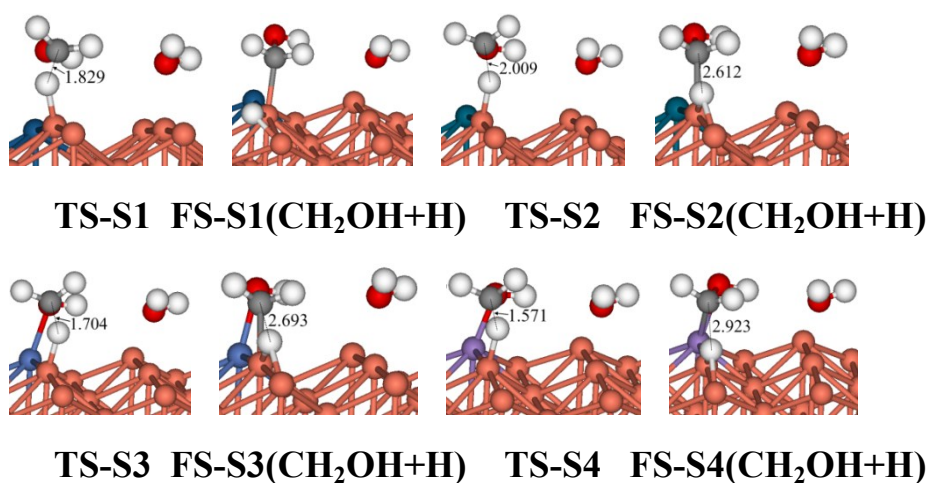

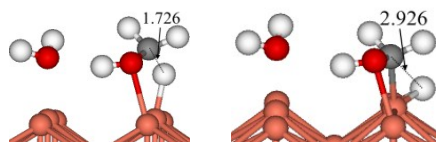

**TS-S5 FS-S5(CH<sub>2</sub>OH+H)**

Fig.S1. The potential energy profile for CH<sub>3</sub>OH dehydrogenation to CH<sub>2</sub>OH on the metal (Pt, Pd, Ni, Mn) doped and un-doped H<sub>2</sub>O/Cu(110) surfaces with the corresponding structures of the TS, and FS. See Fig.2 for color coding.

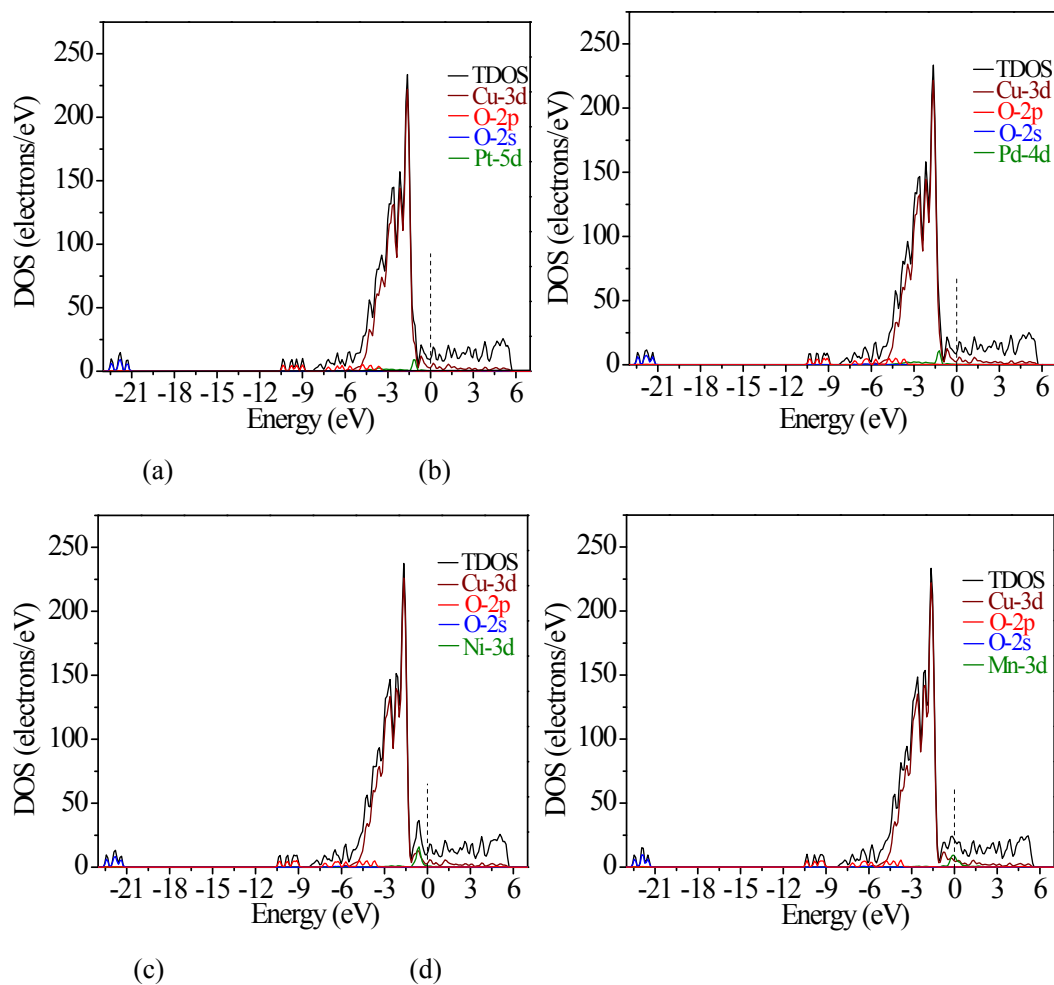

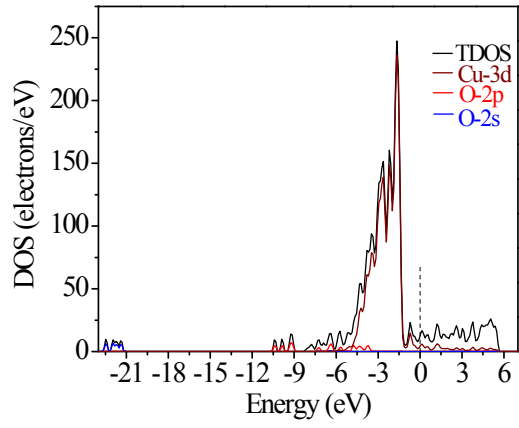

(e)

Fig.S2. The calculated total and partial density of states of the metal doped  $\text{H}_2\text{O}/\text{Cu}(110)$  (Fig.S2-a~d) and un-doped  $\text{H}_2\text{O}/\text{Cu}(110)$  (Fig.S2-e), the Fermi energy is set to zero.
